# Supplementary material for: Cooperative action of non-digestible oligosaccharides improves lipid metabolism of high-fat diet-induced mice
Source: Royal Society of Chemistry journal article supplement (doi:10.1039/d4fo03183k), 2024-01-01
Supplement: d4fo03183k1.pdf [file d4fo03183k1.pdf]

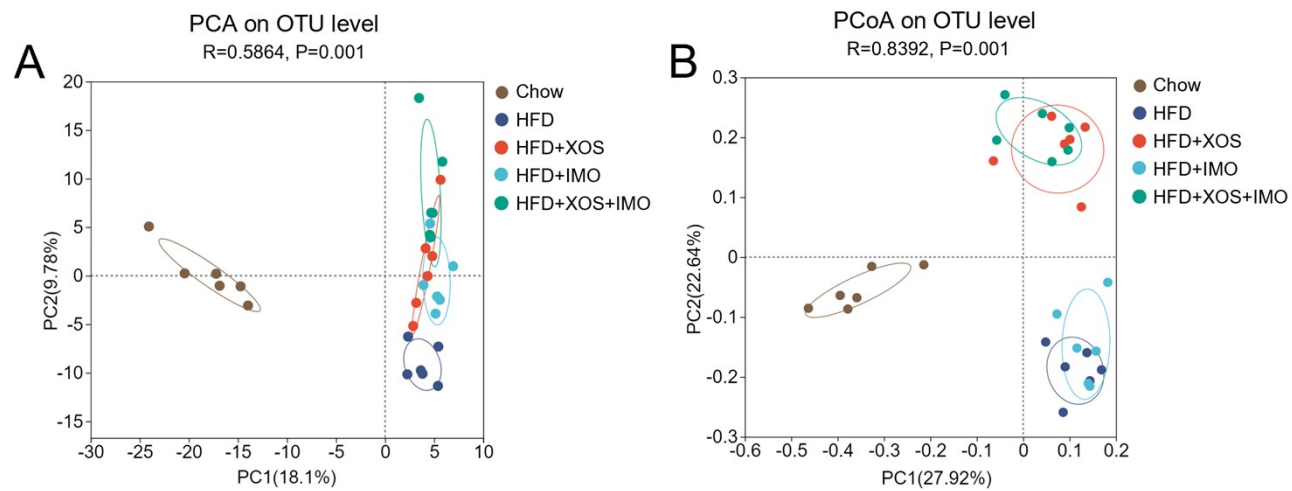

Supplementary Table 1  $\beta$ -Diversity of the fecal microbiotas based on PCA and PCoA analysis.



Supplementary Table 2 Primers used for quantitative real-time PCR

| Gene           | Forward Primer (5'-3')    | Reverse Primer (5'-3')    |
|----------------|---------------------------|---------------------------|
| <i>β-actin</i> | CATCCGTAAAGACCTCTATGCCAAC | ATGGAGCCACCGATCCACA       |
| <i>Cd36</i>    | ATTAATGGCACAGACGCAGC      | AGGCATTGGCTGGAAGAACA      |
| <i>Pparγ</i>   | GCCCTTCACTACTGTTGACTTCTCC | CAGGCTCCACTTTGATTGCACTTTG |
| <i>Acc1</i>    | GGAGATGTACGCTGACCGAG      | TACCCGACGCATGGTTTTCA      |
| <i>Fasn</i>    | TGGTCACAGACGATGACAGGA     | AGGCGTCGAACTTGGACAGA      |
| <i>Srebp1c</i> | GACTGACTTCCAGGACCTGTTGTG  | GGAGGAGGCTTCTTTGCTGTGAG   |
| <i>Scd1</i>    | TTCTTGCGATACTCTGGTGC      | CGGGATTGAATGTTCTTGTCGT    |
| <i>Cpt1a</i>   | CTCCGCCTGAGCCATGAAG       | CACCAGTGATGATGCCATTCT     |
| <i>Pparaα</i>  | CTCTGGCAGCGAATGTAGGAAGTC  | GCACGGTAGACCAAGGCTGTTAG   |
